# Supplementary material
Source: PubMed Central journal article supplement (PMC7686869)
Supplement: jama-e2019839-s006.pdf [file jama-e2019839-s006.pdf]

## Data Sharing Statement

### Data

**Data available:** Yes

**Data types:** Deidentified participant data

**How to access data:** Please contact Eshetu Atenafu at the University Health Network, [eshetu.atenafu@uhnresearch.ca](mailto:eshetu.atenafu@uhnresearch.ca)

**When available:** beginning date: 12-01-2022

### Supporting Documents

**Document types:** None

### Additional Information

**Who can access the data:** Researchers with funded study protocol whose proposed use of the data has been approved.

**Types of analyses:** For a specified purpose.

**Mechanisms of data availability:** With a signed data access agreement.
